# Supplementary material for: Genetic variability and associations of Trakehner and other horse populations in Lithuania
Source: Copernicus journal article supplement (doi:10.5194/aab-69-323-2026), 2026-06-02
Supplement: Supplementary file [file aab-69-323-2026-supplement.pdf]

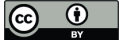

*Supplement of*

## **Genetic variability and associations of Trakehner and other horse populations in Lithuania**

**Alma Račkauskaitė et al.**

*Correspondence to:* Alma Račkauskaitė ([alma.rackauskaite@lsmu.lt](mailto:alma.rackauskaite@lsmu.lt))

The copyright of individual parts of the supplement might differ from the article licence.

**Table S1.** Allelic frequencies of blood group and blood protein polymorphism systems in all and reference horses.

| Locus      | Allele               | All horses |       |       |       |       | Signif                             | Reference horses |       |       |       |       | Signif                              |
|------------|----------------------|------------|-------|-------|-------|-------|------------------------------------|------------------|-------|-------|-------|-------|-------------------------------------|
|            |                      | TRAK       | ARAB  | BW    | LW    | ZEM   |                                    | TRAK             | ARAB  | BW    | LW    | ZEM   |                                     |
| <i>EAA</i> | <i>a</i>             | 0.007      | 0.007 | 0.020 | 0.013 | 0.002 | ***                                | 0.000            | 0.000 | 0.000 | 0.000 | 0.003 | ***ARAB;                            |
|            | <i>abd</i>           | 0.017      | 0.024 | 0.071 | 0.084 | 0.043 |                                    | 0.019            | 0.017 | 0.042 | 0.000 | 0.038 | TRAK; ZEM;                          |
|            | <i>ad</i>            | 0.318      | 0.459 | 0.342 | 0.319 | 0.357 |                                    | 0.358            | 0.483 | 0.375 | 0.455 | 0.359 | ns <sup>BW; LW</sup>                |
|            | <i>b</i>             | 0.012      | 0.038 | 0.046 | 0.023 | 0.051 |                                    | 0.012            | 0.017 | 0.042 | 0.023 | 0.051 |                                     |
|            | <i>bc</i>            | 0.101      | 0.019 | 0.061 | 0.052 | 0.140 |                                    | 0.093            | 0.000 | 0.083 | 0.023 | 0.135 |                                     |
|            | <i>c</i>             | 0.003      | 0.007 | 0.010 | 0.023 | 0.043 |                                    | 0.000            | 0.000 | 0.000 | 0.023 | 0.048 |                                     |
|            | <i>A<sup>-</sup></i> | 0.543      | 0.445 | 0.449 | 0.487 | 0.363 |                                    | 0.519            | 0.483 | 0.458 | 0.477 | 0.365 |                                     |
| <i>EAC</i> | <i>a</i>             | 0.464      | 0.490 | 0.403 | 0.439 | 0.434 | ***                                | 0.475            | 0.483 | 0.458 | 0.455 | 0.442 | *** ARAB;                           |
|            | <i>C<sup>-</sup></i> | 0.536      | 0.510 | 0.597 | 0.561 | 0.566 |                                    | 0.525            | 0.517 | 0.542 | 0.545 | 0.558 | LW; TRAK;<br>ŽEM; **BW              |
| <i>EAD</i> | <i>ad</i>            | 0.003      | 0.010 | 0.020 | 0.029 | 0.205 | ***ARAB; LW;                       | 0.000            | 0.033 | 0.000 | 0.023 | 0.205 | ***ZEM;                             |
|            | <i>adl</i>           | 0.000      | 0.012 | 0.000 | 0.000 | 0.008 | TRAK; ZEM;                         | 0.000            | 0.033 | 0.000 | 0.000 | 0.006 | **TRAK;                             |
|            | <i>bcm</i>           | 0.041      | 0.065 | 0.077 | 0.048 | 0.046 | *BW                                | 0.031            | 0.067 | 0.167 | 0.045 | 0.035 | ns <sup>ARAB; BW;</sup>             |
|            | <i>cfgm</i>          | 0.030      | 0.002 | 0.087 | 0.023 | 0.002 |                                    | 0.049            | 0.017 | 0.042 | 0.023 | 0.003 | LW                                  |
|            | <i>cfm</i>           | 0.050      | 0.002 | 0.015 | 0.000 | 0.000 |                                    | 0.049            | 0.000 | 0.000 | 0.000 | 0.000 |                                     |
|            | <i>cgm</i>           | 0.136      | 0.149 | 0.163 | 0.184 | 0.057 |                                    | 0.136            | 0.083 | 0.250 | 0.159 | 0.071 |                                     |
|            | <i>dfk</i>           | 0.088      | 0.017 | 0.046 | 0.068 | 0.001 |                                    | 0.080            | 0.017 | 0.042 | 0.023 | 0.000 |                                     |
|            | <i>dghm</i>          | 0.096      | 0.005 | 0.092 | 0.084 | 0.388 |                                    | 0.111            | 0.017 | 0.083 | 0.136 | 0.391 |                                     |
|            | <i>dk</i>            | 0.134      | 0.125 | 0.128 | 0.158 | 0.066 |                                    | 0.117            | 0.133 | 0.208 | 0.205 | 0.054 |                                     |
|            | <i>dkl</i>           | 0.043      | 0.151 | 0.026 | 0.032 | 0.004 |                                    | 0.043            | 0.167 | 0.000 | 0.045 | 0.006 |                                     |
|            | <i>dl</i>            | 0.144      | 0.200 | 0.102 | 0.129 | 0.046 |                                    | 0.142            | 0.133 | 0.042 | 0.136 | 0.038 |                                     |
|            | <i>D<sup>-</sup></i> | 0.235      | 0.262 | 0.245 | 0.245 | 0.176 |                                    | 0.241            | 0.300 | 0.167 | 0.205 | 0.189 |                                     |
| <i>EAK</i> | <i>a</i>             | 0.002      | 0.055 | 0.020 | 0.026 | 0.019 | ns                                 | 0.006            | 0.067 | 0.042 | 0.023 | 0.022 | ns                                  |
|            | <i>K<sup>-</sup></i> | 0.998      | 0.945 | 0.980 | 0.974 | 0.981 |                                    | 0.994            | 0.933 | 0.958 | 0.977 | 0.978 |                                     |
| <i>EAP</i> | <i>b</i>             | 0.038      | 0.012 | 0.046 | 0.058 | 0.045 | ns                                 | 0.062            | 0.000 | 0.042 | 0.045 | 0.038 | ns                                  |
|            | <i>P<sup>-</sup></i> | 0.962      | 0.988 | 0.954 | 0.942 | 0.955 |                                    | 0.938            | 1.000 | 0.958 | 0.955 | 0.962 |                                     |
| <i>EAQ</i> | <i>a</i>             | 0.002      | 0.007 | 0.000 | 0.000 | 0.001 | ***                                | 0.111            | 0.117 | 0.125 | 0.091 | 0.000 | *** LW;                             |
|            | <i>abc</i>           | 0.083      | 0.067 | 0.071 | 0.065 | 0.001 |                                    | 0.000            | 0.000 | 0.000 | 0.000 | 0.003 | TRAK; ZEM;                          |
|            | <i>ac</i>            | 0.000      | 0.002 | 0.000 | 0.000 | 0.003 |                                    | 0.204            | 0.100 | 0.208 | 0.182 | 0.077 | ***ARAB;                            |
|            | <i>b</i>             | 0.172      | 0.127 | 0.199 | 0.239 | 0.077 |                                    | 0.210            | 0.117 | 0.167 | 0.182 | 0.372 | ns <sup>BW</sup>                    |
|            | <i>c</i>             | 0.184      | 0.101 | 0.189 | 0.219 | 0.357 |                                    | 0.475            | 0.667 | 0.500 | 0.545 | 0.548 |                                     |
|            | <i>Q<sup>-</sup></i> | 0.560      | 0.695 | 0.541 | 0.477 | 0.561 |                                    | 0.111            | 0.117 | 0.125 | 0.091 | 0.000 |                                     |
| <i>EAU</i> | <i>a</i>             | 0.089      | 0.024 | 0.250 | 0.171 | 0.129 | ***BW;                             | 0.117            | 0.033 | 0.083 | 0.114 | 0.151 | *ZEM;                               |
|            | <i>U<sup>-</sup></i> | 0.911      | 0.976 | 0.750 | 0.829 | 0.871 | **ZEM;<br>*LW;                     | 0.883            | 0.967 | 0.917 | 0.886 | 0.849 | ns <sup>ARAB; BW;</sup><br>LW; TRAK |
| <i>Al</i>  | <i>A</i>             | 0.535      | 0.421 | 0.520 | 0.494 | 0.821 | ***                                | 0.543            | 0.433 | 0.667 | 0.477 | 0.821 | *** ARAB;                           |
|            | <i>B</i>             | 0.465      | 0.579 | 0.480 | 0.506 | 0.179 |                                    | 0.457            | 0.567 | 0.333 | 0.523 | 0.179 | LW; TRAK;<br>*ZEM;                  |
| <i>Gc</i>  | <i>F</i>             | 0.887      | 0.913 | 0.796 | 0.855 | 0.902 | **TRAK                             | 0.889            | 0.967 | 0.917 | 0.773 | 0.905 | ns <sup>BW</sup><br>*TRAK           |
|            | <i>S</i>             | 0.113      | 0.087 | 0.204 | 0.145 | 0.098 | ns <sup>ARAB; BW; LW;</sup><br>ZEM | 0.111            | 0.033 | 0.083 | 0.227 | 0.095 | ns <sup>ARAB; BW;</sup><br>LW; ZEM  |

|           |          |       |       |       |       |       |                             |       |       |       |       |       |                         |
|-----------|----------|-------|-------|-------|-------|-------|-----------------------------|-------|-------|-------|-------|-------|-------------------------|
| <i>Es</i> | <i>F</i> | 0.083 | 0.038 | 0.082 | 0.106 | 0.334 | ***ZEM;                     | 0.068 | 0.083 | 0.083 | 0.114 | 0.349 | *LW;                    |
|           | <i>I</i> | 0.892 | 0.962 | 0.852 | 0.832 | 0.523 | ns <sup>ARAB; BW; LW;</sup> | 0.889 | 0.917 | 0.875 | 0.864 | 0.532 | ns <sup>ARAB; BW;</sup> |
|           | <i>S</i> | 0.025 | 0.000 | 0.066 | 0.061 | 0.141 | TRAK                        | 0.043 | 0.000 | 0.042 | 0.023 | 0.119 | TRAK; ŽEM               |
|           | <i>X</i> | 0.000 | 0.000 | 0.000 | 0.000 | 0.002 |                             | 0.068 | 0.083 | 0.083 | 0.114 | 0.349 |                         |
| <i>Xk</i> | <i>F</i> | 0.003 | 0.000 | 0.010 | 0.019 | 0.002 | ns                          | 0.000 | 0.000 | 0.000 | 0.023 | 0.000 | ns                      |
|           | <i>K</i> | 0.952 | 0.976 | 0.980 | 0.958 | 0.997 |                             | 0.926 | 0.950 | 1.000 | 0.909 | 1.000 |                         |
|           | <i>S</i> | 0.045 | 0.024 | 0.010 | 0.023 | 0.001 |                             | 0.074 | 0.050 | 0.000 | 0.068 | 0.000 |                         |
| <i>Tf</i> | <i>D</i> | 0.369 | 0.084 | 0.296 | 0.190 | 0.451 | ***ARAB                     | 0.364 | 0.050 | 0.208 | 0.205 | 0.462 | ns                      |
|           | <i>F</i> | 0.326 | 0.558 | 0.429 | 0.487 | 0.393 | **LW; TRAK                  | 0.333 | 0.633 | 0.417 | 0.523 | 0.391 |                         |
|           | <i>H</i> | 0.002 | 0.024 | 0.020 | 0.023 | 0.000 | *ZEM                        | 0.006 | 0.017 | 0.000 | 0.000 | 0.000 |                         |
|           | <i>O</i> | 0.219 | 0.327 | 0.153 | 0.152 | 0.114 | ns <sup>BW</sup>            | 0.222 | 0.300 | 0.208 | 0.182 | 0.103 |                         |
|           | <i>R</i> | 0.084 | 0.007 | 0.102 | 0.148 | 0.041 |                             | 0.074 | 0.000 | 0.167 | 0.091 | 0.045 |                         |

TRAK = Trakehner; ARAB = Arabian; BW = Baltic Warmblood; LW = Lithuanian Warmblood; ZEM = Zemaitukai; Signif = significance for HWE; ns = not significant; \*  $P < 0.05$ ; \*\*  $P < 0.01$ ; \*\*\*  $P < 0.001$ .
